# Supplementary material for: Specification and Simplification of Analytical Methods to Determine Wine Color
Source: MDPI journal article supplement (doi:10.3390/pr10122707), 2022-12-15
Supplement: s1 [file s1]

## Supplementary Data

### S1.1. Used Red wine

*Table S1: Variety, Origin, and Vintage of the used red wines*

| <b>Number</b> | <b>Variety</b>            | <b>Country</b> | <b>Vintage</b> |
|---------------|---------------------------|----------------|----------------|
| <b>1</b>      | <b>Cabernet Sauvignon</b> | France         | 2018           |
| <b>2</b>      | <b>Cabernet Sauvignon</b> | Italy          | 2018           |
| <b>3</b>      | <b>Cabernet Sauvignon</b> | USA            | 2014           |
| <b>4</b>      | <b>Cabernet Sauvignon</b> | Germany        | 2018           |
| <b>5</b>      | <b>Cabernet Sauvignon</b> | Australia      | 2016           |
| <b>6</b>      | <b>Cabernet Sauvignon</b> | Spain          | 2016           |
| <b>7</b>      | <b>Cabernet Sauvignon</b> | Italy          | 2019           |
| <b>8</b>      | <b>Merlot</b>             | Italy          | 2018           |
| <b>9</b>      | <b>Merlot</b>             | France         | 2018           |
| <b>10</b>     | <b>Merlot</b>             | USA            | <b>2018</b>    |
| <b>11</b>     | <b>Merlot</b>             | France         | 2016           |
| <b>12</b>     | <b>Merlot</b>             | New Zealand    | 2018           |
| <b>13</b>     | <b>Merlot</b>             | France         | 2019           |
| <b>14</b>     | <b>Merlot</b>             | USA            | 2017           |
| <b>15</b>     | <b>Pinot Noir</b>         | France         | 2019           |
| <b>16</b>     | <b>Pinot Noir</b>         | Germany        | 2019           |
| <b>17</b>     | <b>Pinot Noir</b>         | Germany        | 2013           |
| <b>18</b>     | <b>Pinot Noir</b>         | Germany        | 2017           |
| <b>19</b>     | <b>Pinot Noir</b>         | Germany        | 2018           |

|           |                    |             |      |
|-----------|--------------------|-------------|------|
| <b>20</b> | <b>Pinot Noir</b>  | New Zealand | 2018 |
| <b>21</b> | <b>Pinot Noir</b>  | New Zealand | 2019 |
| <b>22</b> | <b>Primitivo</b>   | Italy       | 2020 |
| <b>23</b> | <b>Primitivo</b>   | Italy       | 2017 |
| <b>24</b> | <b>Primitivo</b>   | Italy       | 2020 |
| <b>25</b> | <b>Primitivo</b>   | Italy       | 2019 |
| <b>26</b> | <b>Primitivo</b>   | Italy       | 2017 |
| <b>27</b> | <b>Primitivo</b>   | USA         | 2018 |
| <b>28</b> | <b>Primitivo</b>   | USA         | 2017 |
| <b>29</b> | <b>Syrah</b>       | Australia   | 2018 |
| <b>30</b> | <b>Syrah</b>       | Italy       | 2019 |
| <b>31</b> | <b>Syrah</b>       | USA         | 2017 |
| <b>32</b> | <b>Syrah</b>       | France      | 2019 |
| <b>33</b> | <b>Syrah</b>       | New Zealand | 2019 |
| <b>34</b> | <b>Syrah</b>       | France      | 2020 |
| <b>35</b> | <b>Syrah</b>       | France      | 2019 |
| <b>36</b> | <b>Tempranillo</b> | Spain       | 2015 |
| <b>37</b> | <b>Tempranillo</b> | Spain       | 2015 |
| <b>38</b> | <b>Tempranillo</b> | Spain       | 2018 |
| <b>39</b> | <b>Tempranillo</b> | Spain       | 2019 |
| <b>40</b> | <b>Tempranillo</b> | Spain       | 2017 |
| <b>41</b> | <b>Tempranillo</b> | Spain       | 2018 |
| <b>42</b> | <b>Tempranillo</b> | Spain       | 2012 |
| <b>43</b> | <b>Vernatsch</b>   | Germany     | 2018 |

|           |                  |         |      |
|-----------|------------------|---------|------|
| <b>44</b> | <b>Vernatsch</b> | Germany | 2018 |
| <b>45</b> | <b>Vernatsch</b> | Italy   | 2019 |
| <b>46</b> | <b>Vernatsch</b> | Italy   | 2019 |
| <b>47</b> | <b>Vernatsch</b> | Italy   | 2019 |
| <b>48</b> | <b>Vernatsch</b> | Italy   | 2019 |
| <b>49</b> | <b>Vernatsch</b> | Germany | 2018 |
| <b>50</b> | <b>Lemberger</b> | Austria | 2018 |
| <b>51</b> | <b>Lemberger</b> | Germany | 2018 |
| <b>52</b> | <b>Lemberger</b> | Austria | 2017 |
| <b>53</b> | <b>Lemberger</b> | Germany | 2019 |
| <b>54</b> | <b>Lemberger</b> | Germany | 2016 |
| <b>55</b> | <b>Lemberger</b> | Germany | 2019 |
| <b>56</b> | <b>Lemberger</b> | Germany | 2019 |

## S1.2. Used White wines

*Table S2: Variety, Origin, and Vintage of the used white wines*

| <b>Number</b> | <b>Variety</b>    | <b>Country</b> | <b>Vintage</b> |
|---------------|-------------------|----------------|----------------|
| <b>1</b>      | <b>Chardonnay</b> | France         | 2018           |
| <b>2</b>      | <b>Chardonnay</b> | Italy          | 2020           |
| <b>3</b>      | <b>Chardonnay</b> | Germany        | 2018           |
| <b>4</b>      | <b>Chardonnay</b> | Spain          | 2019           |
| <b>5</b>      | <b>Chardonnay</b> | Germany        | 2016           |

|           |                   |           |      |
|-----------|-------------------|-----------|------|
| <b>6</b>  | <b>Chardonnay</b> | Australia | 2019 |
| <b>7</b>  | <b>Chardonnay</b> | USA       | 2018 |
| <b>8</b>  | <b>Riesling</b>   | Germany   | 2015 |
| <b>9</b>  | <b>Riesling</b>   | France    | 2017 |
| <b>10</b> | <b>Riesling</b>   | USA       | 2013 |
| <b>11</b> | <b>Riesling</b>   | Germany   | 2018 |
| <b>12</b> | <b>Riesling</b>   | Germany   | 2019 |
| <b>13</b> | <b>Riesling</b>   | Germany   | 2020 |
| <b>14</b> | <b>Riesling</b>   | Germany   | 2020 |
| <b>15</b> | <b>Riesling</b>   | Germany   | 2019 |
| <b>16</b> | <b>Riesling</b>   | Germany   | 2018 |
| <b>17</b> | <b>Riesling</b>   | Germany   | 2019 |
| <b>18</b> | <b>Riesling</b>   | Germany   | 2019 |
| <b>19</b> | <b>Riesling</b>   | Germany   | 2018 |
| <b>20</b> | <b>Riesling</b>   | Germany   | 2019 |
| <b>21</b> | <b>Riesling</b>   | Germany   |      |
| <b>22</b> | <b>Pinot gris</b> | Italy     | 2019 |
| <b>23</b> | <b>Pinot gris</b> | Italy     | 2020 |

|           |                        |             |      |
|-----------|------------------------|-------------|------|
| <b>24</b> | <b>Pinot gris</b>      | France      | 2017 |
| <b>25</b> | <b>Pinot gris</b>      | New Zealand | 2018 |
| <b>26</b> | <b>Pinot gris</b>      | Germany     | 2019 |
| <b>27</b> | <b>Pinot gris</b>      | Germany     | 2019 |
| <b>28</b> | <b>Pinot gris</b>      | Germany     | 2019 |
| <b>29</b> | <b>Sauvignon blanc</b> | France      | 2019 |
| <b>30</b> | <b>Sauvignon blanc</b> | Germany     | 2019 |
| <b>31</b> | <b>Sauvignon blanc</b> | Italy       | 2019 |
| <b>32</b> | <b>Sauvignon blanc</b> | USA         | 2019 |
| <b>33</b> | <b>Sauvignon blanc</b> | New Zealand | 2020 |
| <b>34</b> | <b>Sauvignon blanc</b> | France      | 2018 |
| <b>35</b> | <b>Sauvignon blanc</b> | Germany     | 2018 |
| <b>36</b> | <b>Pinot blanc</b>     | Germany     | 2019 |
| <b>37</b> | <b>Pinot blanc</b>     | Germany     | 2020 |
| <b>38</b> | <b>Pinot blanc</b>     | Germany     | 2018 |
| <b>39</b> | <b>Pinot blanc</b>     | Germany     | 2017 |
| <b>40</b> | <b>Pinot blanc</b>     | Germany     | 2020 |
| <b>41</b> | <b>Pinot blanc</b>     | Italy       | 2019 |

|           |                       |         |      |
|-----------|-----------------------|---------|------|
| <b>42</b> | <b>Pinot blanc</b>    | France  | 2017 |
| <b>43</b> | <b>Gewürztraminer</b> | Germany | 2016 |
| <b>44</b> | <b>Gewürztraminer</b> | Germany | 2018 |
| <b>45</b> | <b>Gewürztraminer</b> | France  | 2019 |
| <b>46</b> | <b>Gewürztraminer</b> | Germany | 2019 |
| <b>47</b> | <b>Gewürztraminer</b> | France  | 2019 |
| <b>48</b> | <b>Gewürztraminer</b> | Spain   | 2019 |
| <b>49</b> | <b>Gewürztraminer</b> | Germany | 2019 |
| <b>50</b> | <b>Gewürztraminer</b> | Italy   | 2019 |
| <b>51</b> | <b>Gewürztraminer</b> | Italy   | 2019 |
| <b>52</b> | <b>Gewürztraminer</b> | Spain   | 2018 |
| <b>53</b> | <b>Gewürztraminer</b> | Germany | 2019 |
| <b>54</b> | <b>Gewürztraminer</b> | France  | 2018 |
| <b>55</b> | <b>Gewürztraminer</b> | Germany | 2019 |
| <b>56</b> | <b>Gewürztraminer</b> | Germany | 2020 |

### S1.3. Photometer settings

*Table S3: Photometer comparison regarding sipper and photometer configuration*

| <b>Parameter</b>            | <b>JASCO V-730</b> | <b>Varian Cary 100</b> |
|-----------------------------|--------------------|------------------------|
| <b>Sipper configuration</b> | 1 mm flow cuvette  |                        |

|                                 |                                                        |                                      |
|---------------------------------|--------------------------------------------------------|--------------------------------------|
| Suction time                    | 3 sec                                                  | 8 sec                                |
| Flow time                       | 0 sec                                                  | 0 sec                                |
| Wait time                       | 1 sec                                                  | 5 sec                                |
| Drain time                      | 5 sec                                                  | 8 sec                                |
| <b>Photometer configuration</b> |                                                        |                                      |
| Photometric mode                | Absorption                                             | Absorption                           |
| Bandwidth                       | 1 nm                                                   | 2 nm                                 |
| Response time                   | 0.96 sec                                               | 0.03-0.6 sec (depends on scan speed) |
| Correction mode                 | Baseline                                               | Baseline                             |
| Light source > 340 nm           | Tungsten lamp                                          | Tungsten lamp                        |
| Light source < 340 nm           | Deuterium lamp                                         | Deuterium lamp                       |
| Filter exchange                 | Stepwise                                               | n. A.                                |
| Monochromator system            | Single monochromator in Rowland off-circle arrangement | Czerny-Turner monochromator          |
| Detector system                 | Si-Photodiode (S1337)                                  | Photomultiplier tube (R928)          |

**Figure S1. Python Code for correlation matrices**

```
#import packages
import numpy as np # numeric calculations
import pandas as pd #excel data import
import matplotlib.pyplot as plt #plotting base
import seaborn as sns #statistical plotting
import warnings
warnings.filterwarnings('ignore')
%matplotlib inline

#import excel file
df = pd.read_excel(r'Excel-file directory')
#show columns and row length
df.shape
# DataFrame optimization
df.columns = df.columns.str.strip() # delete spaces in column names
df.info()# check properties (non-null count)
df.isnull().sum() #check properties (null-count)
data= df.dropna() # drop rows without values
data.isnull().sum() # re-check null count
data = data.rename(columns={'420 nm': 'A[420 nm]', '520 nm': 'A[520 nm]', '620
nm': 'A[620 nm]'}) #rename columns
round(data.describe(),2) # describe the data count, mean, std 25%,50%,75%
quantils
#Calculate and plot Heatmap
sns.set(font_scale=1.4)#set overall font size
plt.figure(figsize=(12,8.27)) #set figure size
correlations = data.corr(method='spearman') # calculate spearman
correlation
mask = np.zeros_like(correlations) # mask the upper half of the correlation
matrix that shows the same as the down half
mask[np.triu_indices_from(mask)] = True
sns.set_style("whitegrid", {'axes.grid' : False}) # Hide Grid
#plot heatmap
sns.heatmap(round(correlations,2), cmap='RdGy', annot=True,
            annot_kws={"size": 18}, vmin=-1, vmax=1,square=True,mask=mask)
plt.yticks(rotation=0) #rotation of y ticks
plt.xticks(rotation=15) #roattion of x ticks
#save plot as vector graphic
plt.savefig(r"save directory", format='svg')
```



**Figure S2. MATLAB Code for interpolation with cubic splines**

```
% Cubic splines
% Enter wavelengths
x = [
380
420
460
525
590
625
675
775
];

% Enter transmission values
y = [
t_380
t_420
t_460
t_525
t_590
t_625
t_675
t_775
];

a = (y(2)-y(1))./(x(2)-x(1));
b = (y(8)-y(7))./(x(8)-x(7));

yy = spline(x,[1; y; 0]);
```

**Figure S3. MATLAB code for interpolation according to Sprague**

```
%%Sprague

% Enter wavelengths
x = [
380
420
460
525
590
625
675
775
];

% Enter transmission values
y = [
t_380
t_420
t_460
t_525
t_590
t_625
t_675
t_775
];

a = (884*y(1)-1960*y(2)+3033*y(3)-2648*y(4)+1080*y(5)-180*y(6))/209;
b = (508*y(1)-540*y(2)+488*y(3)-367*y(4)+144*y(5)-24*y(6))/209;
c = (-24*y(3)+144*y(4)-367*y(5)+488*y(6)-540*y(7)+508*y(8))/209;
d = (-180*y(3)+1080*y(4)-2648*y(5)+3033*y(6)-1960*y(7)+884*y(8))/209;

w = [a; b; y; c; d];

b = size(y);

e = zeros(b(1)-1,6);

%%

for i=3:9
a0 = w(i);
a1 = (w(i-2)-8*w(i-1)+8*w(i+1)-w(i+2))/12;
a2 = (-w(i-2)+16*w(i-1)-30*w(i)+16*w(i+1)-w(i+2))/24;
a3 = (-9*w(i-2)+39*w(i-1)-70*w(i)+66*w(i+1)-33*w(i+2)+7*w(i+3))/24;
a4 = (13*w(i-2)-64*w(i-1)+126*w(i)-124*w(i+1)+61*w(i+2)-12*w(i+3))/24;
a5 = (-5*w(i-2)+25*w(i-1)-50*w(i)+50*w(i+1)-25*w(i+2)+5*w(i+3))/24;

e(i-2,1)= a0;
e(i-2,2)= a1;
e(i-2,3)= a2;
e(i-2,4)= a3;
e(i-2,5)= a4;
e(i-2,6)= a5;
end
```
